# Supplementary material for: Diversity and interdomain networks of bacterial, pico-protist and nano-protist communities in a marine ranching
Source: Frontiers journal article supplement (doi:10.3389/fmicb.2025.1620645), 2025-07-17
Supplement: Data_Sheet_1.xlsx [file Data_Sheet_1.xlsx]

## Sheet: Appendix A
Supplementary Information
Diversity and interdomain networks of bacterial, pico- and nano-protist communities in a marine ranching
Author information
Xinyi Zheng1, Xin Guo2,3, Xiaoqing Lin1, Cheng Huang1, Lingfeng Huang1 *
1 Key Laboratory of the Coastal and Wetland Ecosystems, College of the Environment and Ecology, Xiamen University, Xiamen, China
2State Key Laboratory of Marine Environmental Science, College of Ocean and Earth Sciences, Fujian Key Laboratory of Marine Carbon Sequestration, Xiamen University, Xiamen, China
3 Carbon Neutral Innovation Research Center, Xiamen University, Xiamen, China
*Corresponding authors: Lingfeng Huang. E-mail: huanglf@xmu.edu.cn
Appendix A The trophic types of different taxonomic groups of microbial protists
Trophic type	Taxa (supergroup; phylum; class; order; family; genus)	Taxonomic	Note	Reference
		level
A. Heterotroph	Alveolata;Chrompodellids;Colpodellidea	Class		1
	Alveolata;Ciliophora;Colpodea	Class	Few of the phylum Ciliophora are parasities (refer to D)	1–3
	Alveolata;Ciliophora;CONThreeP;CONThreeP_X;CONThreeP_XX;Askenasia	Genus
	Alveolata;Ciliophora;Heterotrichea	Class
	Alveolata;Ciliophora;Nassophorea	Class
	Alveolata;Ciliophora;Oligohymenophorea	Class
	Alveolata;Ciliophora;Phyllopharyngea	Class
	Alveolata;Ciliophora;Spirotrichea	Class
	Alveolata;Dinoflagellata;Dinophyceae;Dinophysiales;Oxyphysiaceae;Phalachroma	Genus		4
	Amoebozoa;Conosa	Phylum		1
	Amoebozoa;Lobosa	Phylum		1
	Hacrobia;Centroheliozoa	Phylum		2,3,5
	Hacrobia;Katablepharidophyta	Phylum		2,3,5
	Hacrobia;Picozoa	Phylum		2,3,5
	Hacrobia;Telonemia	Phylum		2,3,5
	Opisthokonta;Choanoflagellida	Phylum		6
	Rhizaria;Cercozoa;Endomyxa;	Class	Few of the Rhizaria are parasities (refer to D) and symbiont (refer to E)	7
	Rhizaria;Cercozoa;Filosa	Class		7
	Rhizaria;Cercozoa;Filosa-Imbricatea	Phylum		2
	Rhizaria;Cercozoa;Filosa-Sarcomonadea	Phylum		2,7
	Rhizaria;Cercozoa;Filosa-Thecofilosea	Phylum		7
	Rhizaria;Cercozoa;Phaeodarea	Class		7
	Rhizaria;Radiolaria;RAD-A(B/C)	Class		3
	Stramenopiles;Ochrophyta;MOCH-4	Class		3,8
	Stramenopiles;Opalozoa;Bicoecea	Class		1,2,5,9
	Stramenopiles;Pseudofungi;Hyphochytriomyceta	Class		1–3
	Stramenopiles;Pseudofungi;MAST	Class		1–3,5,9
	Stramenopiles;Sagenista	Class		1,2,5,9
B. Mixotroph	Alveolata;Dinoflagellata;Dinophyceae	Class	Few of the Class Dinophyceae are heterotroph (refer to A), photoautotroph (refer to C) and symbiont (refer to E)	6,9
	Archaeplastida;Chlorophyta;Chlorodendrophyceae	Class		1
	Archaeplastida;Chlorophyta;Mamiellophyceae;Mamiellales;Mamiellaceae;Micromonas	Genus	Most of phylum Chlorophyta are photoautotroph (refer to C)	1
	Archaeplastida;Chlorophyta;Pyramimonadophyceae;Pyramimonadales;Halosphaeraceae;Halosphaera	Genus		1
	Archaeplastida;Chlorophyta;Pyramimonadophyceae;Pyramimonadales;Pterospermaceae;Pterosperma	Genus		1
	Archaeplastida;Chlorophyta;Pyramimonadophyceae;Pyramimonadales;Pyramimonadaceae; Pyramimonas	Genus		10
	Archaeplastida;Chlorophyta;Trebouxiophyceae	Class		1
	Hacrobia;Haptophyta;Prymnesiophyceae;Phaeocystales	Order	Most of order Prymnesiophyceae are photoautotroph (refer to C)	6,11
	Hacrobia;Haptophyta;Prymnesiophyceae;Prymnesiales	Order		6,11
	Rhizaria;Cercozoa;Chlorarachniophyceae	Class		2,10
	Stramenopiles;Ochrophyta;Raphidophyceae;Raphidophyceae_X;Raphidophyceae_XX;Chattonella	Genus		6
C. Photoautotroph	Alveolata;Dinoflagellata;Dinophyceae;Suessiales	Order		6,9
	Archaeplastida;Chlorophyta;Chloropicophyceae	Class	Few of the phylum Chlorophyta are mixotroph (refer to B)	1
	Archaeplastida;Chlorophyta;Florideophyceae	Class		1
	Archaeplastida;Chlorophyta;Mamiellophyceae	Class		1
	Archaeplastida;Chlorophyta;Mamiellophyceae;Dolichomastigales	Order		1
	Archaeplastida;Chlorophyta;Mamiellophyceae;Mamiellales;Bathycoccaceae;Bathycoccus	Genus		1
	Archaeplastida;Chlorophyta;Mamiellophyceae;Mamiellales;Bathycoccaceae;Ostreococcus	Genus		1
	Archaeplastida;Chlorophyta;Mamiellophyceae;Mamiellales;Mamiellaceae;Mantoniella	Genus		1
	Archaeplastida;Chlorophyta;Pedinophyceae	Class		1
	Archaeplastida;Chlorophyta;Prasino-Clade-9	Class		1
	Archaeplastida;Chlorophyta;Pyramimonadales	Class		1
	Archaeplastida;Chlorophyta;Pyramimonadophyceae;Pseudoscourfieldiales;Pycnococcaceae	Family		1
	Archaeplastida;Chlorophyta;Ulvophyceae	Class		1
	Archaeplastida;Prasinodermophyta;Palmophyllophyceae;Prasinococcales	Order		1
	Archaeplastida;Prasinodermophyta;Prasinodermophyceae	Class		1
	Hacrobia;Cryptophyta;Cryptophyceae	Class		6
	Hacrobia;Haptophyta;Pavlovophyceae	Class		6
	Hacrobia;Haptophyta;Prymnesiophyceae	Class	Few of the class Prymnesiophyceae are mixotroph (refer to B)	6
	Hacrobia;Haptophyta;Rappephyceae	Class		6
	Stramenopiles;Ochrophyta; Bacillariophyta	Class		1–3,9
	Stramenopiles;Ochrophyta;Bolidophyceae	Class		1–3,9
	Stramenopiles;Ochrophyta;Chrysomerophyceae	Class		1–3,9
	Stramenopiles;Ochrophyta;Chrysophyceae	Class		2,9
	Stramenopiles;Ochrophyta;Dictyochophyceae	Class		2,3
	Stramenopiles;Ochrophyta;MOCH-1/2/5	Class		3,8
	Stramenopiles;Ochrophyta;Pelagophyceae	Class		1–3,9
	Stramenopiles;Ochrophyta;Pinguiophyceae	Class		1–3,9
	Stramenopiles;Ochrophyta;Raphidophyceae	Class	Few of the class Raphidophyceae are mixotroph (refer to B)	1–3,9
D. Parasites	Alveolata;Alveolata_X;Ellobiopsidae;	Class		9,12
	Alveolata;Apicomplexa	Phylum		2,3,9,12
	Alveolata;Ciliophora;Oligohymenophorea;Apostomatia	Order		3
	Alveolata;Dinoflagellata;Ellobiophyceae	Class		2,3,6,9,12,13
	Alveolata;Dinoflagellata;Syndiniales	Class		2,3,6,9,12,13
	Alveolata;Perkinsea	Phylum		2,9,12
	Opisthokonta;Mesomycetozoa	Phylum		2,3
	Rhizaria;Cercozoa;Filosa-Imbricatea;Marimonadida;Marimonadida_X;Pseudopirsonia	Genus		1,3,12
	Rhizaria;Cercozoa;Filosa-Thecofilosea;Cryomonadida;Cryothecomonas-lineage; Cryothecomonas	Genus		2,3,12
	Stramenopiles;Pseudofungi;Oomycota	Class		2,3,9
E. Symbiont	Alveolata;Dinoflagellata;Dinophyceae;Dinophysiales;Amphisoleniaceae	Family		3
	Alveolata;Dinoflagellata;Dinophyceae;Dinophysiales;Dinophysiaceae	Family		3
	Alveolata;Dinoflagellata;Dinophyceae;Peridiniales	Order		3
	Alveolata;Dinoflagellata;Noctilucophyceae	Class		3
	Rhizaria;Radiolaria;Acantharea	Class		3
	Rhizaria;Radiolaria;Polycystinea;Nassellarida	Order		3
	Rhizaria;Radiolaria;Polycystinea;Spumellaria	Order		3
Supplementary reference
1. Adl, S. M. et al. Revisions to the Classification, Nomenclature, and Diversity of Eukaryotes. Journal of Eukaryotic Microbiology 66, 4–119 (2019).
2. Xiong, W. et al. A global overview of the trophic structure within microbiomes across ecosystems. Environment International 151, 106438 (2021).
3. Lima-Mendez, G. et al. Determinants of community structure in the global plankton interactome. Science 348, 1262073 (2015).
4. Gómez, F. A checklist and classification of living dinoflagellates (Dinoflagellata, Alveolata). CICIMAR Oceánides 27, 65–140 (2012).
5. Obiol, A., Muhovic, I. & Massana, R. Oceanic heterotrophic flagellates are dominated by a few widespread taxa. Limnology and Oceanography 66, 4240–4253 (2021).
6. Handbook of the Protists. (Springer International Publishing, 2016).
7. Fiore-Donno, A. M. et al. Functional Traits and Spatio-Temporal Structure of a Major Group of Soil Protists (Rhizaria: Cercozoa) in a Temperate Grassland. Frontiers in Microbiology 10, (2019).
8. Massana, R., Del Campo, J., Sieracki, M. E., Audic, S. & Logares, R. Exploring the uncultured microeukaryote majority in the oceans: reevaluation of ribogroups within stramenopiles. ISME J 8, 854–866 (2014).
9. Singer, D. et al. Protist taxonomic and functional diversity in soil, freshwater and marine ecosystems. Environment International 146, 106262 (2021).
10. Li, Q., Edwards, K. F., Schvarcz, C. R. & Steward, G. F. Broad phylogenetic and functional diversity among mixotrophic consumers of Prochlorococcus. The ISME Journal 16, 1557–1569 (2022).
11. Porter, K. G. Phagotrophic phytoflagellates in microbial food webs. Hydrobiologia 159, 89–97 (1988).
12. Skovgaard, A. Dirty Tricks in the Plankton: Diversity and Role of Marine Parasitic Protists. Acta protozoologica 53, 51–62 (2014).
13. Park, M. G., Yih, W. & Coats, D. W. Parasites and phytoplankton, with special emphasis on dinoflagellate infections. J Eukaryot Microbiol 51, 145–155 (2004).
